# Supplementary figures and images for: A Genomic-Clinicopathologic Nomogram for the Prediction of Lymph Node Invasion in Prostate Cancer
Source: Hindawi journal article supplement (doi:10.1155/2021/5554708), 2021-05-26

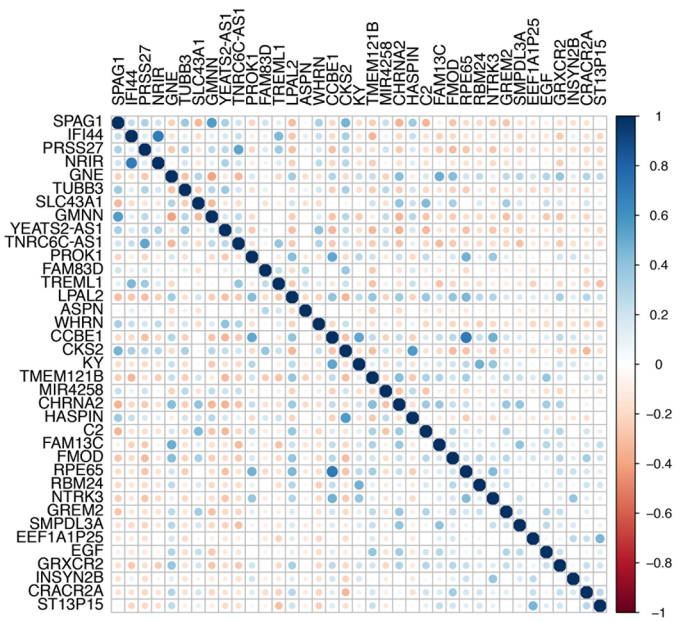

Supplement: f1 [file 5554708.f1.zip]
